# Supplementary material for: Nanophasic morphologies as a function of the composition and molecular weight of the macromolecular cross-linker in poly(N-vinylimidazole)-l-poly(tetrahydrofuran) amphiphilic conetworks: bicontinuous domain structure in broad composition ranges
Source: Royal Society of Chemistry journal article supplement (doi:10.1039/c6ra25356c), 2017-01-01
Supplement: c6ra25356c1.pdf [file c6ra25356c1.pdf]

## ELECTRONIC SUPPLEMENTARY INFORMATION

### **Nanophasic Morphologies as a Function of Composition and Molecular Weight of Macromolecular Cross-linker in Poly(*N*-vinylimidazole)-*l*-poly(tetrahydrofuran) Amphiphilic Conetworks: Bicontinuous Domain Structure in Broad Composition Ranges**

Csaba Fodor,<sup>a†\*</sup> Gergely Kali,<sup>a#</sup> Ralf Thomann,<sup>b</sup> Yi Thomann,<sup>b</sup> Béla Iván<sup>a\*</sup> and Rolf Mülhaupt<sup>b</sup>

<sup>a</sup>Polymer Chemistry Research Group, Institute of Materials and Environmental Chemistry, Research Centre for Natural Sciences, Hungarian Academy of Sciences  
H-1117 Budapest, Magyar tudósok körútja 2, Hungary

<sup>b</sup>Freiburg Materials Research Center, Albert-Ludwigs University Freiburg  
Stefan-Meier-Str. 21, D-79104 Freiburg, Germany

<sup>†</sup> Present address: Macromolecular Chemistry and New Polymeric Materials, Zernike Institute for Advanced Materials, University of Groningen, Nijenborgh 4, 9747 AG Groningen, The Netherlands

<sup>#</sup> Present address: Department of Organic Macromolecular Chemistry, Saarland University, Campus C 4.2, 66123 Saarbrücken, Germany

\* Authors to whom correspondence should be addressed

## Supporting Table and Figures

**Table S1.** Molecular weights of methacrylate-telechelic PTHF cross-linkers, feed ratios, compositions of poly(*N*-vinylimidazole)-*l*-poly(tetrahydrofuran) (PVI*m*-*l*-PTHF) conetworks and average molecular weights of PVI*m* segments between two cross-linking points ( $M_c$ ).

| Sample ID | $M_n$ of PTHF<br>(g·mol <sup>-1</sup> ) | VIm/PTHF in<br>feed (wt %) | PVI <i>m</i> /PTHF in<br>conetwork (wt %) | $M_c$ of PVI <i>m</i><br>(g·mol <sup>-1</sup> ) |
|-----------|-----------------------------------------|----------------------------|-------------------------------------------|-------------------------------------------------|
| P2.2k-25  | 2170                                    | 80/20                      | 75/25                                     | 3255                                            |
| P2.2k-36  |                                         | 70/30                      | 62/36                                     | 1770                                            |
| P2.2k-47  |                                         | 60/40                      | 53/47                                     | 1224                                            |
| P2.2k-59  |                                         | 50/50                      | 41/59                                     | 754                                             |
| P2.2k-74  |                                         | 40/60                      | 26/74                                     | 381                                             |
| P2.2k-89  |                                         | 70/30                      | 11/89                                     | 134                                             |
| P6.8k-52  | 6850                                    | 80/20                      | 48/52                                     | 3162                                            |
| P6.8k-61  |                                         | 70/30                      | 39/61                                     | 2190                                            |
| P6.8k-69  |                                         | 60/40                      | 31/69                                     | 1539                                            |
| P6.8k-80  |                                         | 50/50                      | 20/80                                     | 856                                             |
| P6.8k-81  |                                         | 40/60                      | 19/81                                     | 803                                             |
| P6.8k-84  |                                         | 70/30                      | 16/84                                     | 652                                             |
| P10k-46   | 10000                                   | 80/20                      | 54/46                                     | 5870                                            |
| P10k-61   |                                         | 70/30                      | 39/61                                     | 3197                                            |
| P10k-66   |                                         | 60/40                      | 34/66                                     | 2576                                            |
| P10k-77   |                                         | 50/50                      | 23/77                                     | 1494                                            |
| P10k-86   |                                         | 40/60                      | 14/86                                     | 814                                             |
| P10k-91   |                                         | 70/30                      | 9/91                                      | 495                                             |

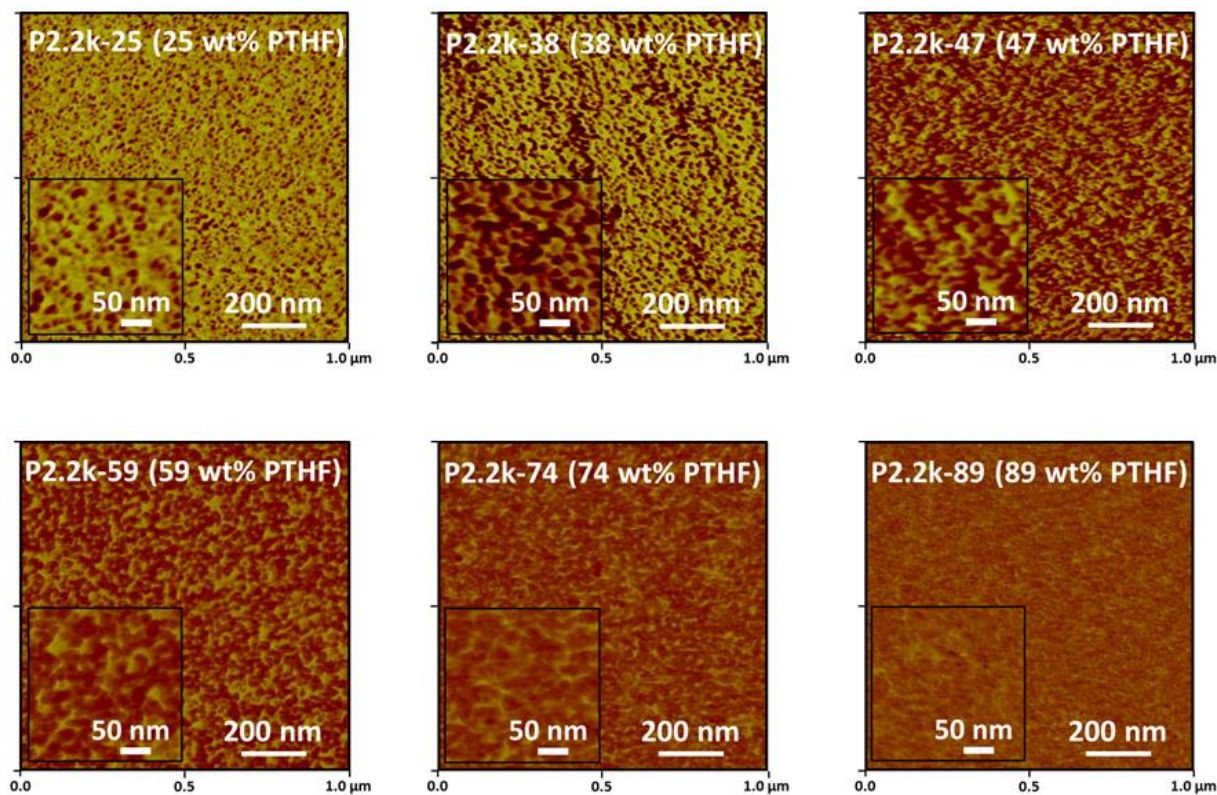

**Figure S1.** Phase mode AFM images of cross sections of poly(*N*-vinylimidazole)/poly(tetrahydrofuran) conetwork samples (P2.2k series) with varying PTHF content (25 wt%, 38 wt%, 47 wt%, 59 wt%, 74 wt% and 89 wt% PTHF). Inset: AFM image magnification of the conetwork sample (picture dimensions 250 nm x 250 nm). The softer PTHF phase appears dark and the harder PVIm is bright.

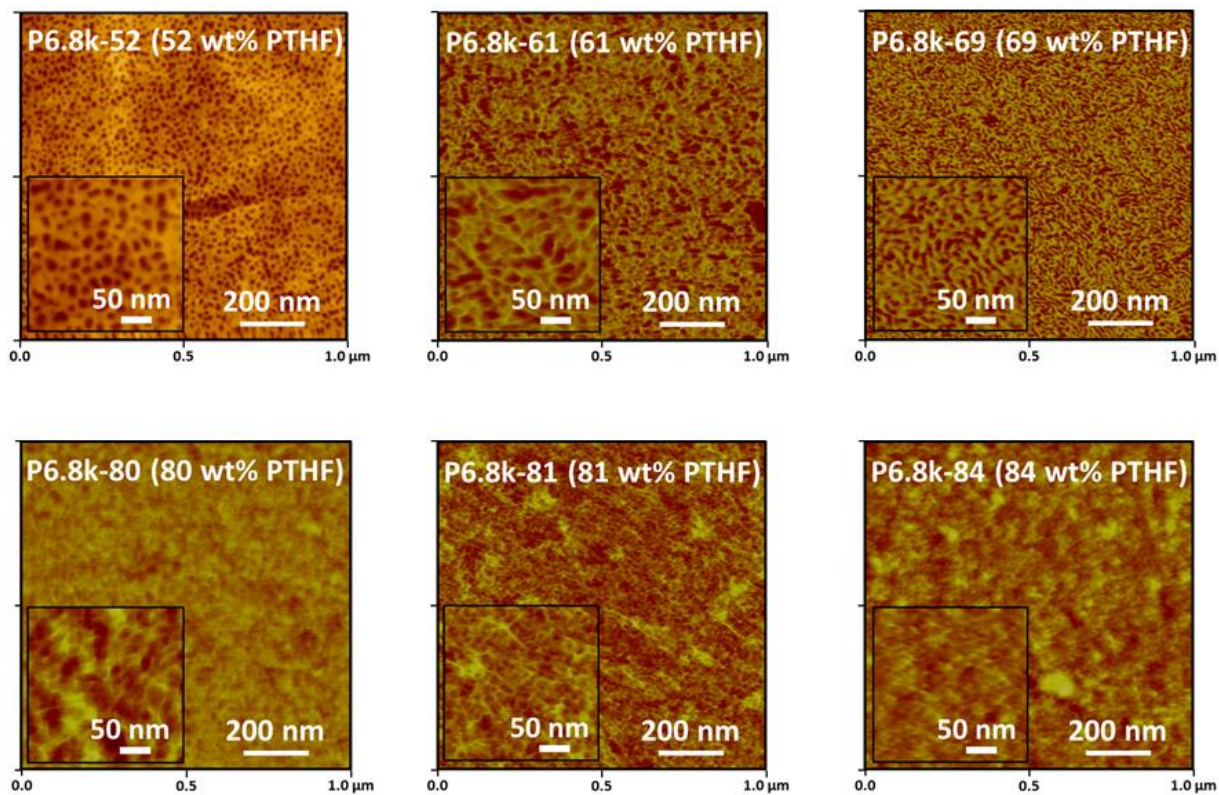

**Figure S2.** Phase mode AFM images of cross sections of poly(*N*-vinylimidazole)/poly(tetrahydrofuran) conetwork samples (P6.8k series) with varying PTHF content (52 wt%, 61 wt%, 69 wt%, 80 wt%, 81 wt% and 84 wt% PTHF). Inset: AFM image magnification of the conetwork sample (picture dimensions 250 nm x 250 nm). The softer PTHF phase appears dark and the harder PVIm is bright.

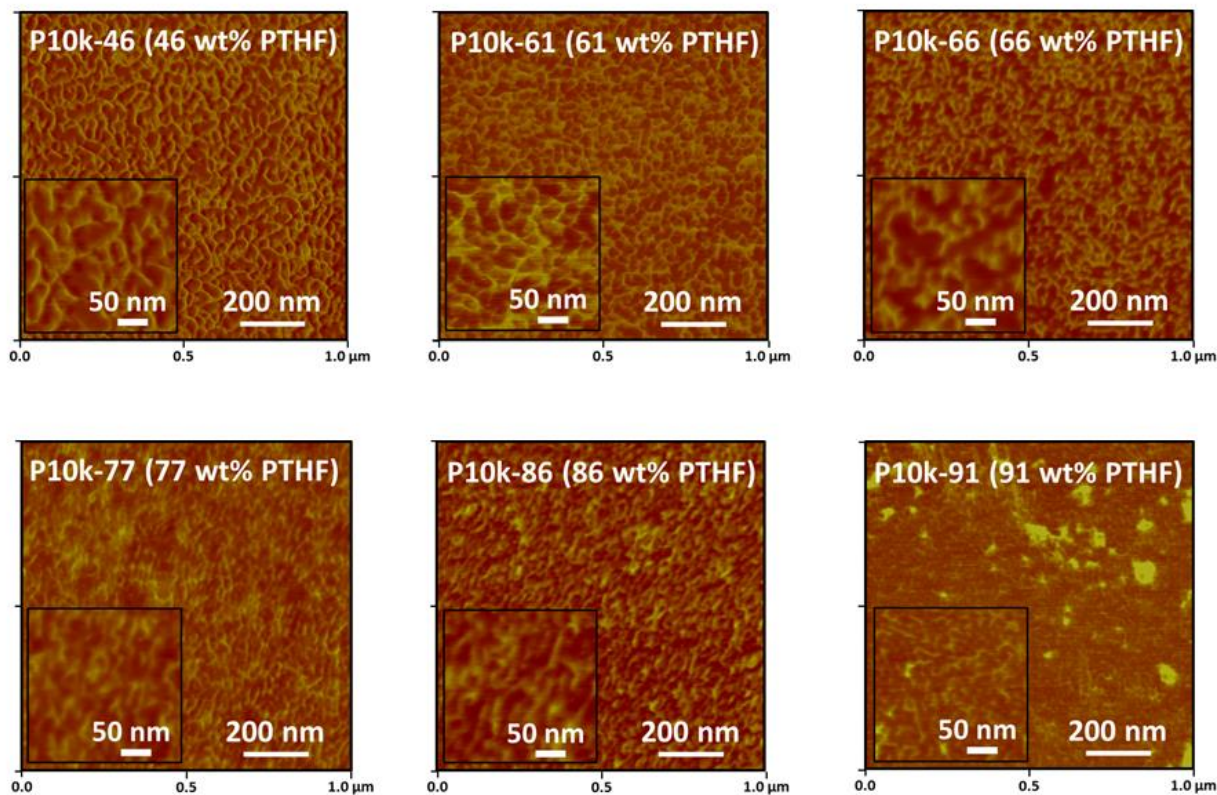

**Figure S3.** Phase mode AFM images of cross sections of poly(*N*-vinylimidazole)-/*l*-poly(tetrahydrofuran) conetwork samples (P10k series) with varying PTHF content (46 wt%, 61 wt%, 66 wt%, 77 wt%, 86 wt% and 91 wt% PTHF). Inset: AFM image magnification of the conetwork sample (picture dimensions 250 nm x 250 nm). The softer PTHF phase appears dark and the harder PVIm is bright.



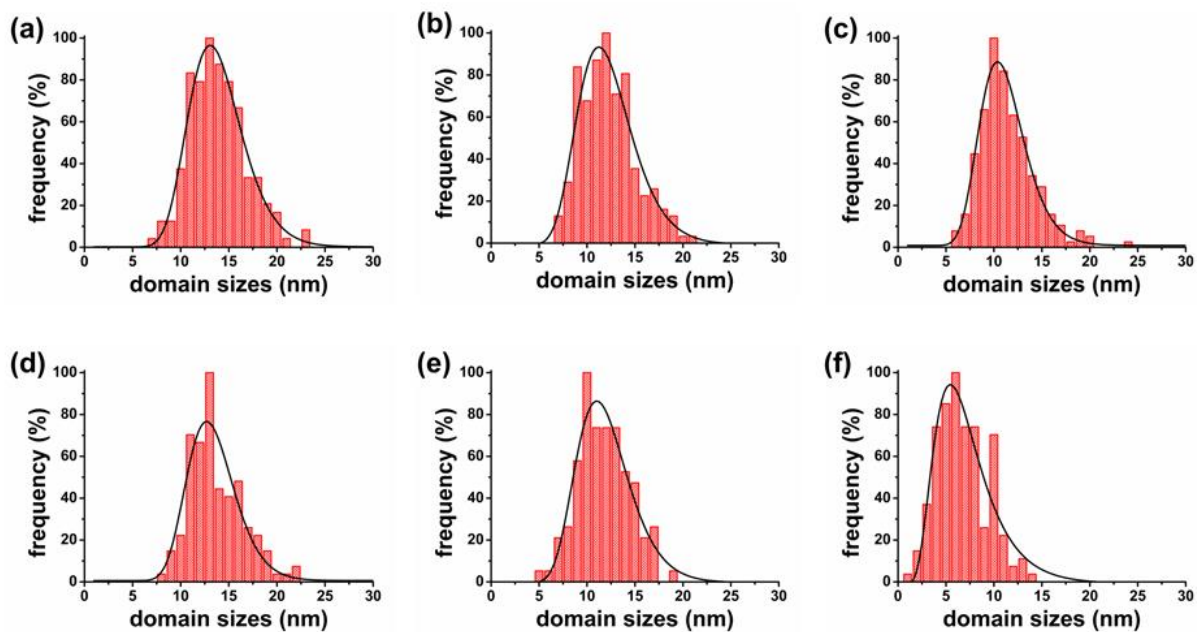

**Figure S4.** The average PTHF domain sizes from the AFM phase mode images of the P2.2k conetworks cross sections with varying PTHF content (a) 25 wt%, (b) 38 wt%, (c) 47 wt%, (d) 59 wt%, (e) 74 wt% and (f) 89 wt% PTHF.

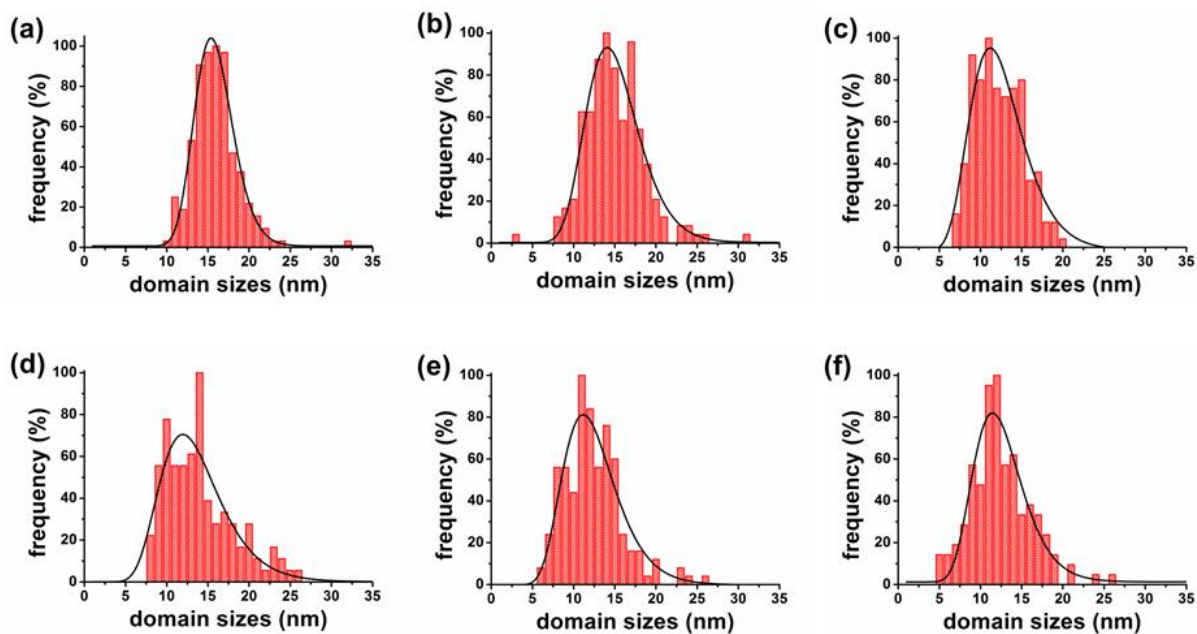

**Figure S5.** The average PTHF domain sizes from the AFM phase mode images of the P6.8k conetworks cross sections with varying PTHF content (a) 52 wt%, (b) 61 wt%, (c) 69 wt%, (d) 80 wt%, (e) 81 wt% and (f) 84 wt% PTHF.

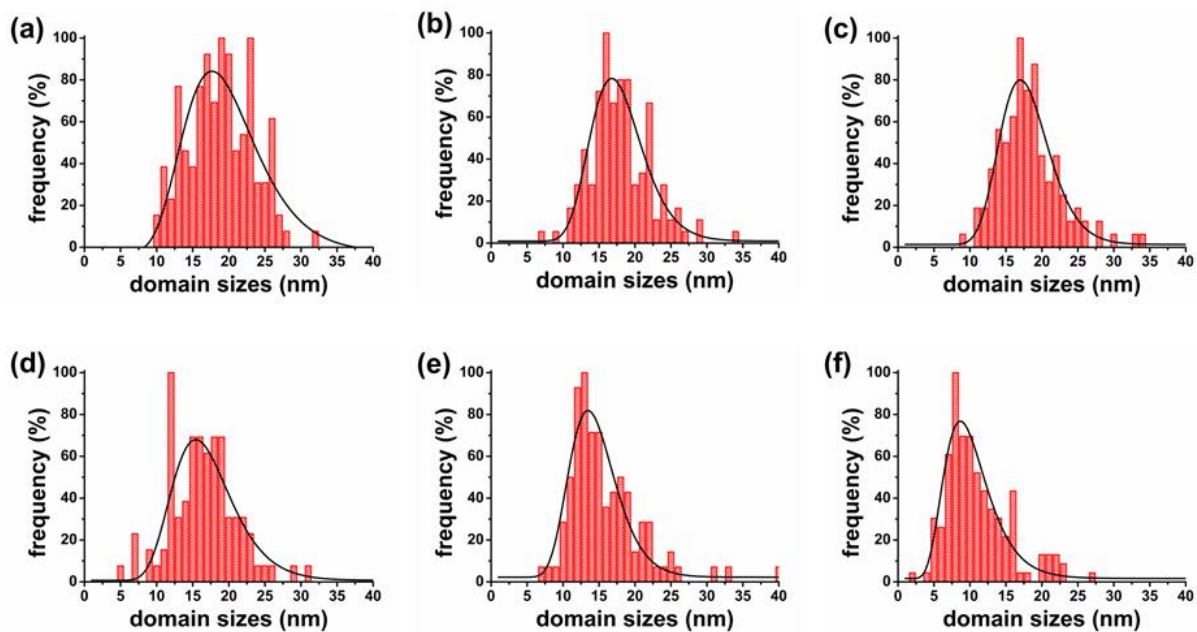

**Figure S6.** The average PTHF domain sizes from the AFM phase mode images of the P10k conetworks cross sections with varying PTHF content (a) 46 wt%, (b) 61 wt%, (c) 66 wt%, (d) 77 wt%, (e) 86 wt% and (f) 91 wt% PTHF.



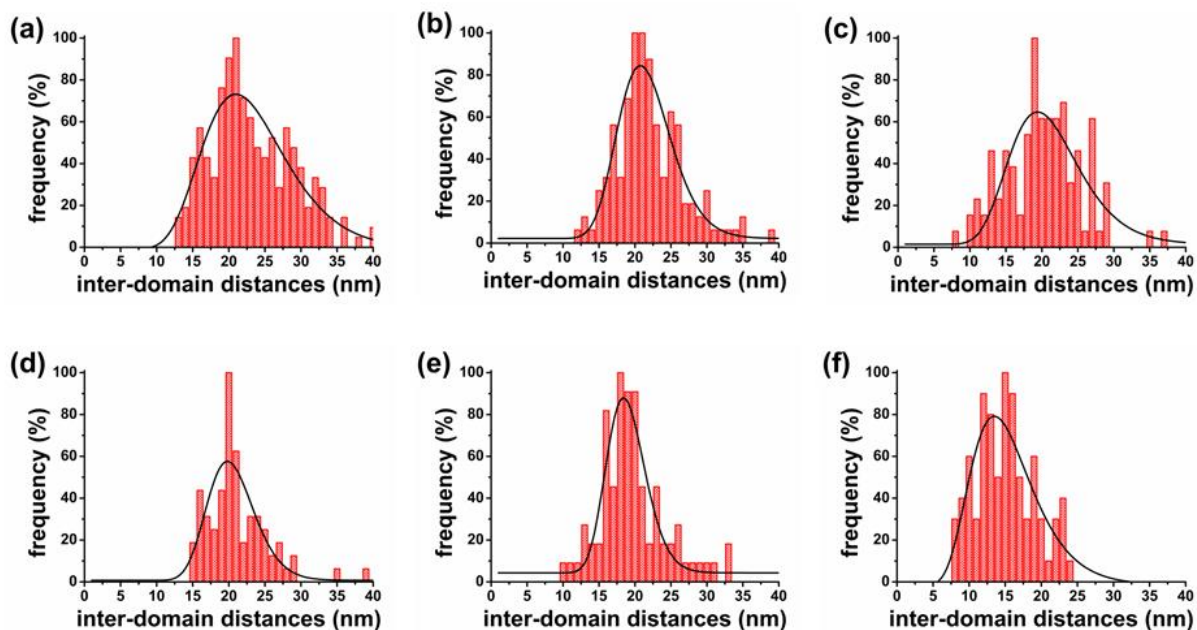

**Figure S7.** The average PTHF inter-domain distances from the AFM phase mode images of the P2.2k conetworks cross sections with varying PTHF content (a) 25 wt%, (b) 38 wt%, (c) 47 wt%, (d) 59 wt%, (e) 74 wt% and (f) 89 wt% PTHF.

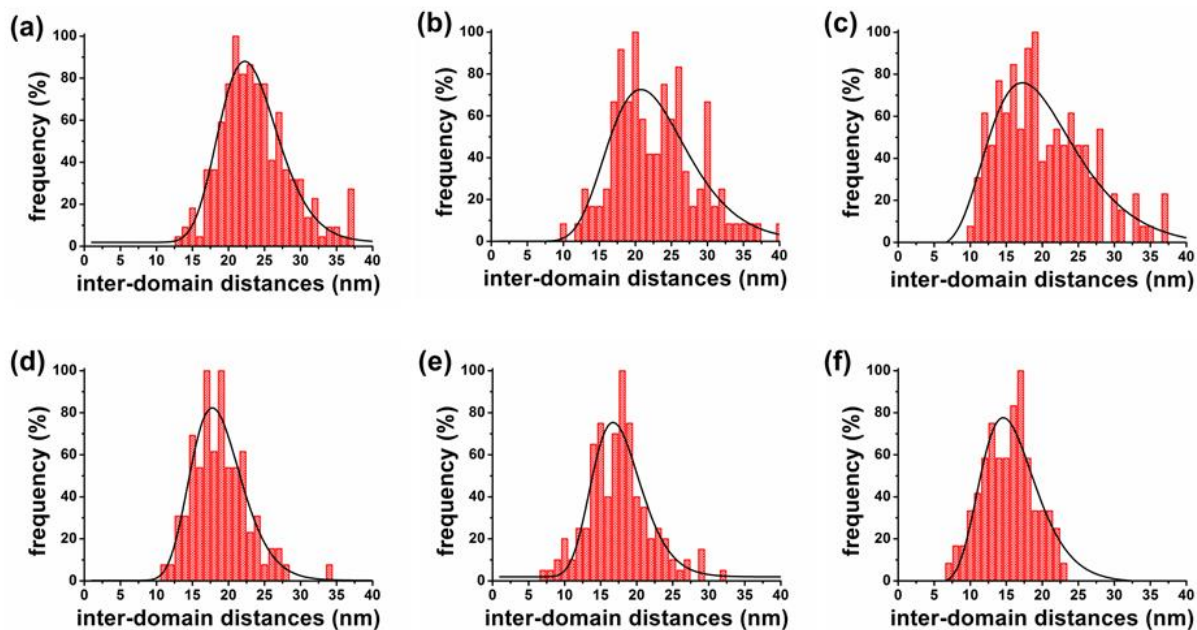

**Figure S8.** The average PTHF inter-domain distances from the AFM phase mode images of the P6.8k conetworks cross sections with varying PTHF content (a) 52 wt%, (b) 61 wt%, (c) 69 wt%, (d) 80 wt%, (e) 81 wt% and (f) 84 wt% PTHF.

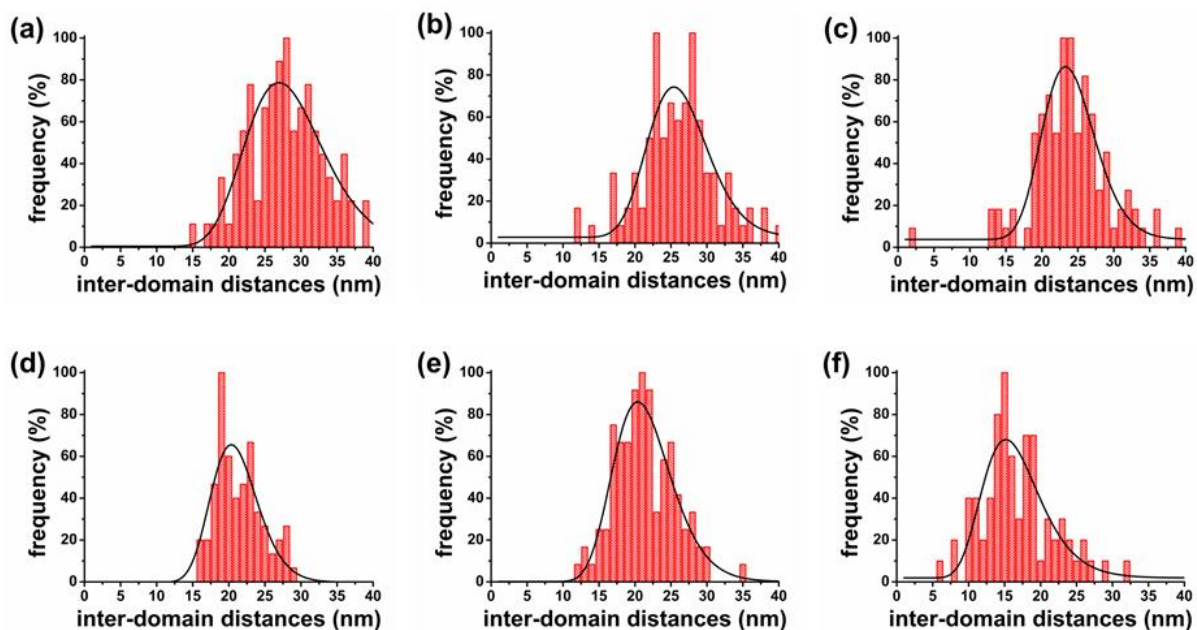

**Figure S9.** The average PTHF inter-domain distances from the AFM phase mode images of the P10k conetworks cross sections with varying PTHF content (a) 46 wt%, (b) 61 wt%, (c) 66 wt%, (d) 77 wt%, (e) 86 wt% and (f) 91 wt% PTHF.
